# Supplementary material for: Exploring inclusion complex of an anti-cancer drug (6-MP) with β-cyclodextrin and its binding with CT-DNA for innovative applications in anti-bacterial activity and photostability optimized by computational study
Source: Royal Society of Chemistry journal article supplement (doi:10.1039/d2ra05072b), 2022-01-01
Supplement: d2ra05072b1.pdf [file d2ra05072b1.pdf]

## Supporting information

# Exploring Inclusion complex of an anti-cancer drug (6-MP) with $\beta$ -Cyclodextrin and its binding with CT-DNA for innovative applications in anti-bacterial activity and photostability optimized by computational study

Modhusudan Mondal <sup>a</sup>, Shatarupa Basak<sup>a</sup>, Salim Ali<sup>a</sup>, Debadrita Roy<sup>a</sup>, Subhadeep Saha<sup>b</sup>, Biswajit Ghosh<sup>a</sup>, Narendra Nath Ghosh<sup>c</sup>, Khusboo Lepcha<sup>d</sup>, Kanak Roy<sup>e</sup> and Mahendra Nath Roy<sup>\*a,f</sup>

<sup>a</sup> Department of Chemistry, University of North Bengal, Darjeeling-734013, India

<sup>b</sup> Department of Chemistry, Government General Degree College, Pedong, Kalimpong-734311, India

<sup>c</sup> Department of Chemistry, University of Gour Banga, Mokdumpur, Malda-732103, India

<sup>d</sup> Department of Microbiology, University of North Bengal, Darjeeling-734013, India

<sup>e</sup> Department of Chemistry, Alipurduar University, Alipurduar-736121, India

<sup>f</sup> Vice-Chancellor, Alipurduar University, Alipurduar-736121, India

\*Corresponding author: Mahendra Nath Roy, Department of Chemistry, University of North Bengal, Darjeeling-734013, E-mail: [mahendraroy2002@yahoo.co.in](mailto:mahendraroy2002@yahoo.co.in) / [vcapdu@gmail.com](mailto:vcapdu@gmail.com)

**Table S1.** Descriptions of the Chemicals used in the work.

| Chemical Name                | Source             | Molecular weight(g/mol) | CAS Number | Mass fraction purity |
|------------------------------|--------------------|-------------------------|------------|----------------------|
| 6-Mercaptopurine Monohydrate | TCI, India         | 152.18(Anh)             | 6112-76-1  | $\geq 0.99$          |
| $\beta$ -Cyclodextrin        | Sigma-Aldrich, USA | 1134.98                 | 7585-39-9  | $\geq 0.99$          |
| Distilled water              | Laboratory made    | -                       | -          | -                    |

**Table S2.** Data for the Job plot performed by UV-Vis spectroscopy for 6-MP+ $\beta$ -CD system at 298.15K<sup>a</sup>

| 6-MP + BETA - CYCLODEXTRIN |                  |                |                        |                                |                |            |                                              |
|----------------------------|------------------|----------------|------------------------|--------------------------------|----------------|------------|----------------------------------------------|
| 6-MP(mL)                   | $\beta$ -CD (mL) | 6-MP( $\mu$ M) | $\beta$ -CD ( $\mu$ M) | [6-MP]/([6-MP]+[ $\beta$ -CD]) | Absorbance (A) | $\Delta A$ | $\Delta A \times [6-MP]/([6-MP]+[\beta-CD])$ |
| 0                          | 3                | 0              | 100                    | 0                              | 0.0000         | 1.9695     | 0.0000                                       |
| 0.3                        | 2.7              | 10             | 90                     | 0.1                            | 0.2196         | 1.7499     | 0.1750                                       |
| 0.6                        | 2.4              | 20             | 80                     | 0.2                            | 0.4197         | 1.5498     | 0.3100                                       |
| 0.9                        | 2.1              | 30             | 70                     | 0.3                            | 0.6164         | 1.3531     | 0.4059                                       |
| 1.2                        | 1.8              | 40             | 60                     | 0.4                            | 0.8145         | 1.1550     | 0.4620                                       |
| 1.5                        | 1.5              | 50             | 50                     | 0.5                            | 1.0116         | 0.9579     | 0.4789                                       |
| 1.8                        | 1.2              | 60             | 40                     | 0.6                            | 1.2072         | 0.7623     | 0.4574                                       |
| 2.1                        | 0.9              | 70             | 30                     | 0.7                            | 1.4195         | 0.5500     | 0.3850                                       |
| 2.4                        | 0.6              | 80             | 20                     | 0.8                            | 1.5985         | 0.3710     | 0.2968                                       |
| 2.7                        | 0.3              | 90             | 10                     | 0.9                            | 1.7827         | 0.1868     | 0.1681                                       |
| 3                          | 0                | 100            | 0                      | 1                              | 1.9695         | 0.0000     | 0.0000                                       |

<sup>a</sup>Standard uncertainties in temperature (T) =  $\pm 0.01$  K.

**Table S3.** Data for the surface tension study of 6-MP+ $\beta$ -CD system (concentration of stock solution of 6-MP = 10 mM, concentration of stock solution of  $\beta$ -CD = 10 mM) at 298.15K<sup>a</sup>.

| Volm of $\beta$ -CD (mL) | Total volume (mL) | Conc of 6-MP (mM) | Conc of $\beta$ -CD (mM) | ST (mN m <sup>-1</sup> ) |
|--------------------------|-------------------|-------------------|--------------------------|--------------------------|
| 0                        | 10                | 10.000            | 0.000                    | 41.1                     |
| 1                        | 11                | 9.091             | 0.909                    | 42.4                     |
| 2                        | 12                | 8.333             | 1.667                    | 43.8                     |

|    |    |       |       |      |
|----|----|-------|-------|------|
| 3  | 13 | 7.692 | 2.308 | 44.8 |
| 4  | 14 | 7.143 | 2.857 | 45.6 |
| 5  | 15 | 6.667 | 3.333 | 46.4 |
| 6  | 16 | 6.250 | 3.750 | 47.1 |
| 7  | 17 | 5.882 | 4.118 | 47.6 |
| 8  | 18 | 5.556 | 4.444 | 48.1 |
| 9  | 19 | 5.263 | 4.737 | 48.5 |
| 10 | 20 | 5.000 | 5.000 | 48.8 |
| 11 | 21 | 4.762 | 5.238 | 49   |
| 12 | 22 | 4.545 | 5.455 | 49.2 |
| 13 | 23 | 4.348 | 5.652 | 49.2 |
| 14 | 24 | 4.167 | 5.833 | 49.2 |
| 15 | 25 | 4.000 | 6.000 | 49.3 |
| 16 | 26 | 3.846 | 6.154 | 49.3 |
| 17 | 27 | 3.704 | 6.296 | 49.4 |
| 18 | 28 | 3.571 | 6.429 | 49.4 |
| 19 | 29 | 3.448 | 6.552 | 49.4 |
| 20 | 30 | 3.333 | 6.667 | 49.5 |

<sup>a</sup>Standard uncertainties in temperature (T) = ±0.01 K.

**Table S4.** Data for the Benesi-Hildebrand double reciprocal plot performed by UV-Vis spectroscopy for 6-MP+β-CD system.

| Temp /K <sup>a</sup> | [6-MP] /μM | [β-CD] /μM | A <sub>0</sub> | A      | ΔA     | 1/[β-CD] /M <sup>-1</sup> | 1/ΔA     | Intercept | Slope  | K <sub>a</sub> /M <sup>-1</sup> |
|----------------------|------------|------------|----------------|--------|--------|---------------------------|----------|-----------|--------|---------------------------------|
| 298.15               | 40         | 10         | 0.8115         | 0.8149 | 0.0033 | 100000                    | 295.9571 | 0.0027    | 21.525 | 7.98*10 <sup>3</sup>            |
|                      | 40         | 20         |                | 0.8193 | 0.0078 | 50000                     | 128.0078 |           |        |                                 |
|                      | 40         | 30         |                | 0.8202 | 0.0087 | 33333                     | 114.2240 |           |        |                                 |
|                      | 40         | 40         |                | 0.8220 | 0.0104 | 25000                     | 95.4769  |           |        |                                 |
|                      | 40         | 50         |                | 0.8241 | 0.0126 | 20000                     | 79.2275  |           |        |                                 |

|  |    |     |  |        |        |       |         |  |  |  |
|--|----|-----|--|--------|--------|-------|---------|--|--|--|
|  | 40 | 60  |  | 0.8247 | 0.0132 | 16667 | 75.5485 |  |  |  |
|  | 40 | 70  |  | 0.8279 | 0.0163 | 14286 | 61.0755 |  |  |  |
|  | 40 | 80  |  | 0.8299 | 0.0184 | 12500 | 54.1997 |  |  |  |
|  | 40 | 90  |  | 0.8314 | 0.0199 | 11111 | 50.0944 |  |  |  |
|  | 40 | 100 |  | 0.8359 | 0.0243 | 10000 | 41.0136 |  |  |  |

<sup>a</sup>Standard uncertainties in temperature (T) = 0.01 K.

**Table S5.** Frequencies at FTIR spectra of 6-MP,  $\beta$ -CD and IC.

|                       | Wave Number / $\text{cm}^{-1}$ | Group                                                       |
|-----------------------|--------------------------------|-------------------------------------------------------------|
| 6-MP                  | 3096.50                        | Stretching of C-H                                           |
|                       | 1666.00                        | Stretching of C=C                                           |
|                       | 1342.00                        | Stretching of C-N                                           |
|                       | 3425.60                        | Stretching of N-H                                           |
|                       | 1272.89                        | Stretching of -C=S                                          |
| $\beta$ -Cyclodextrin | 3288.72                        | stretching of O-H                                           |
|                       | 2906.90                        | stretching of -C-H from -<br>CH <sub>2</sub>                |
|                       | 1417.80                        | bending of -C-H from -CH <sub>2</sub>                       |
|                       | 1152.50                        | bending of C-O-C                                            |
|                       | 1028.40                        | stretching of C-C-O                                         |
|                       | 937.38                         | skeletal vibration involving<br>$\alpha$ -1,4linkage        |
| 6-MP- $\beta$ -CD     | 3288.90                        | Stretching of -O-H of $\beta$ -CD                           |
|                       | 2904.20                        | Stretching of -C-H from -<br>CH <sub>2</sub> of $\beta$ -CD |
|                       | 1613.90                        | Stretching of C=C                                           |
|                       | 1344.40                        | Stretching of C-N                                           |
|                       | 1150.00                        | Stretching of -C=S                                          |

|  |         |                                     |
|--|---------|-------------------------------------|
|  | 1022.20 | Stretching of -C-C-O of $\beta$ -CD |
|--|---------|-------------------------------------|

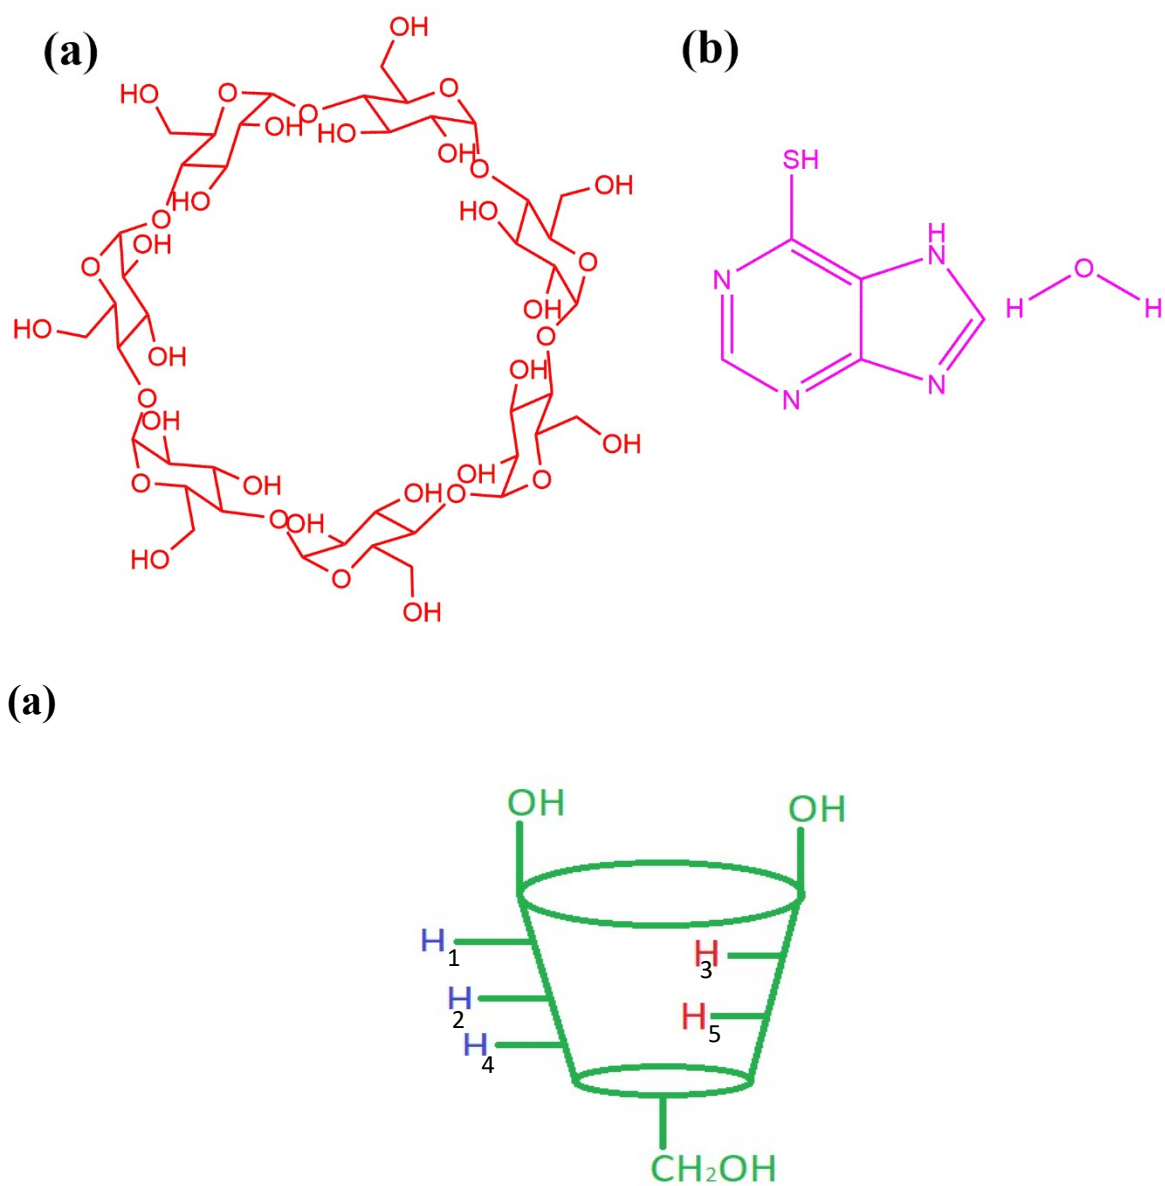

**Figure S1.** Molecular structures of (a) Beta Cyclodextrin and (b) 6-Mercaptopurine monohydrate.

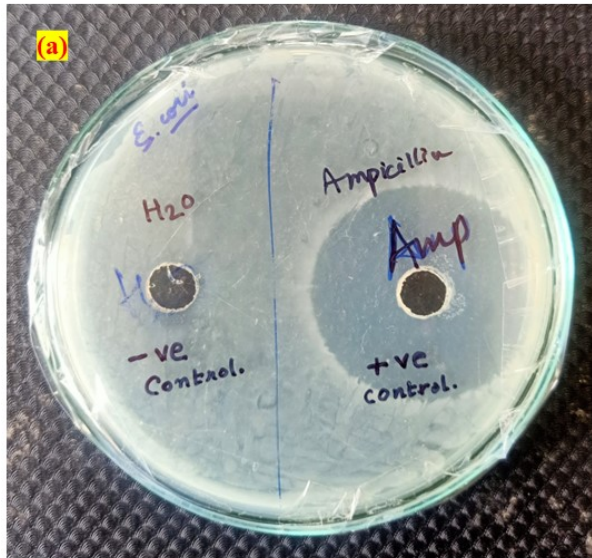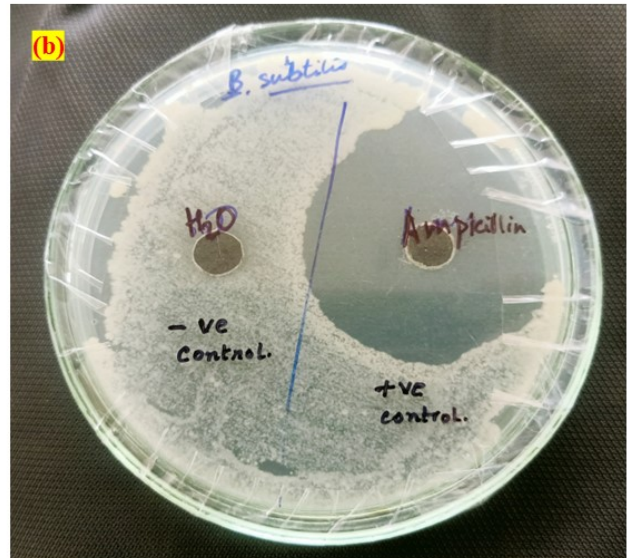

**Figure S2:** Pictures with Ampicillin as positive controls and sterile distilled water as negative controls in case of (a) *E.Coli.* and (b) *B. subtilis.*

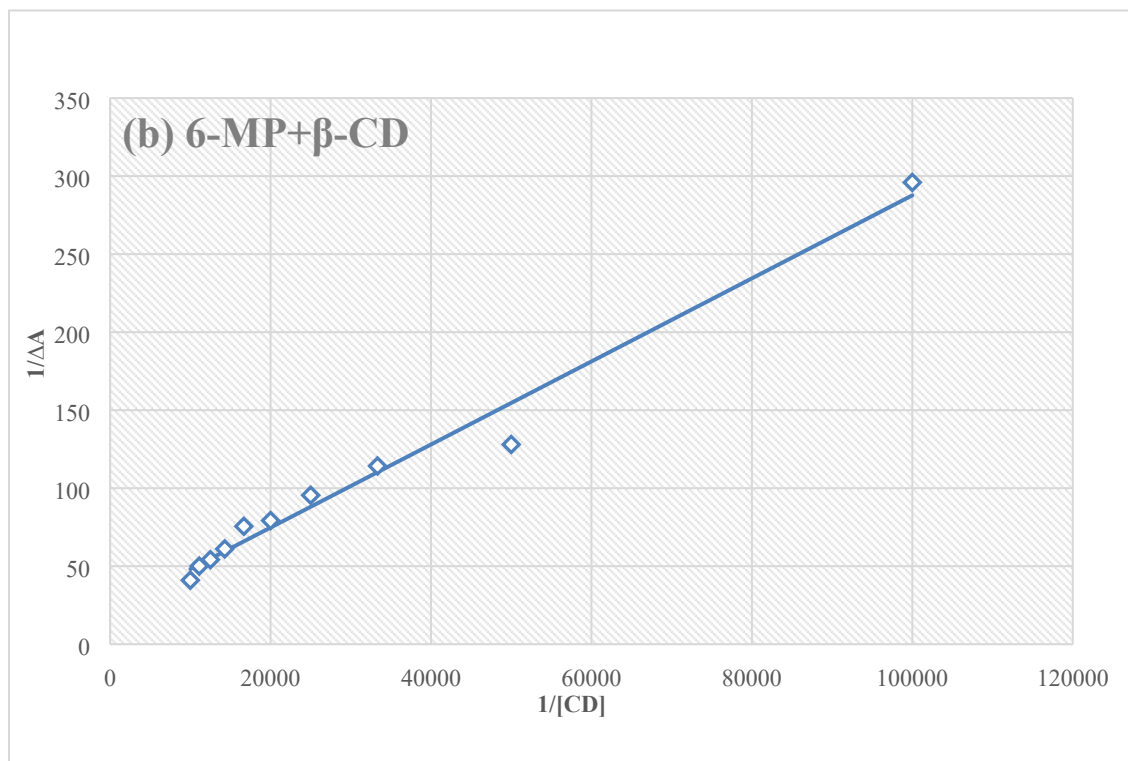

**Figure S3.** Benesi-Hildebrand double reciprocal plot for the effect of  $\beta$ -CD on the absorbance of TZ (324 nm) at 298.15 K (X axis =  $1/[\text{CD}]$  and Y axis =  $1/\Delta A$ ).

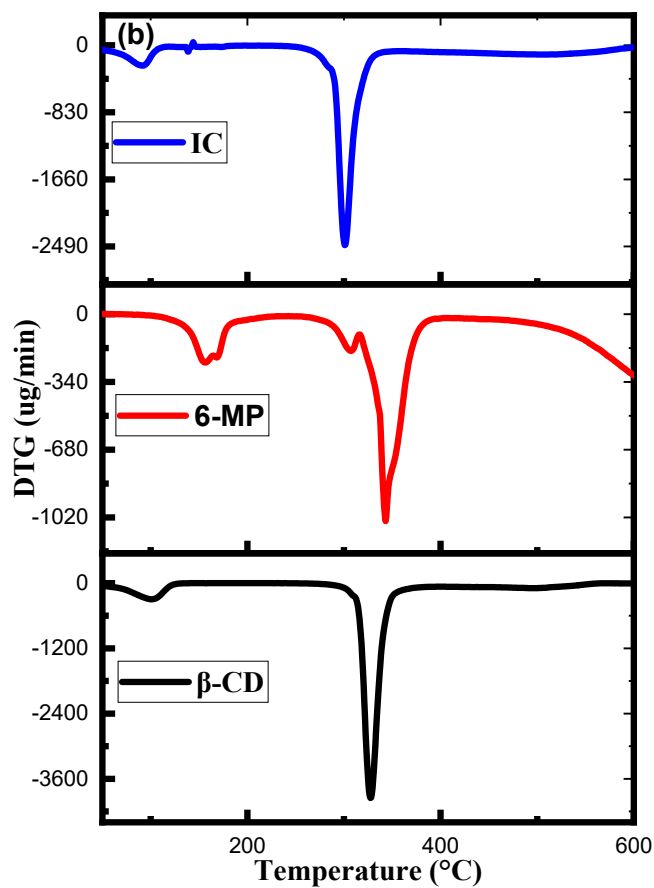

**Figure S4.** DTG thermograms of  $\beta$ -CD, 6-MP and its IC.

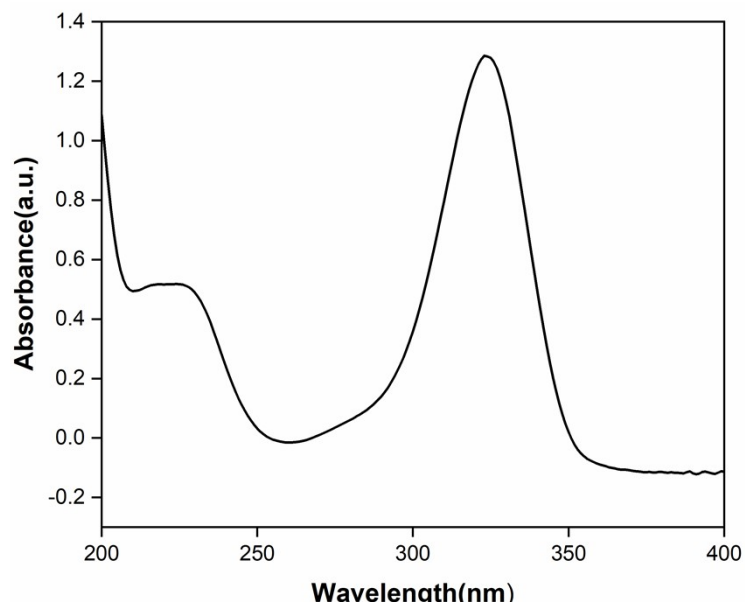

**Figure S5.** UV-Vis spectra of saturated concentration of IC.

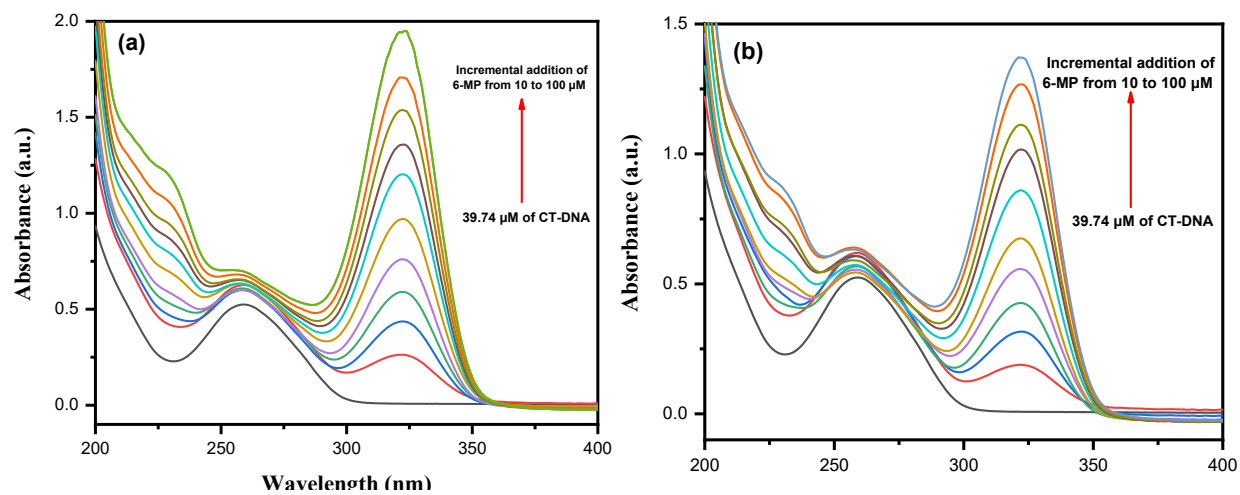

**Figure S6.** UV-Vis spectra of CT-DNA in presence of different concentration of 6-MP.



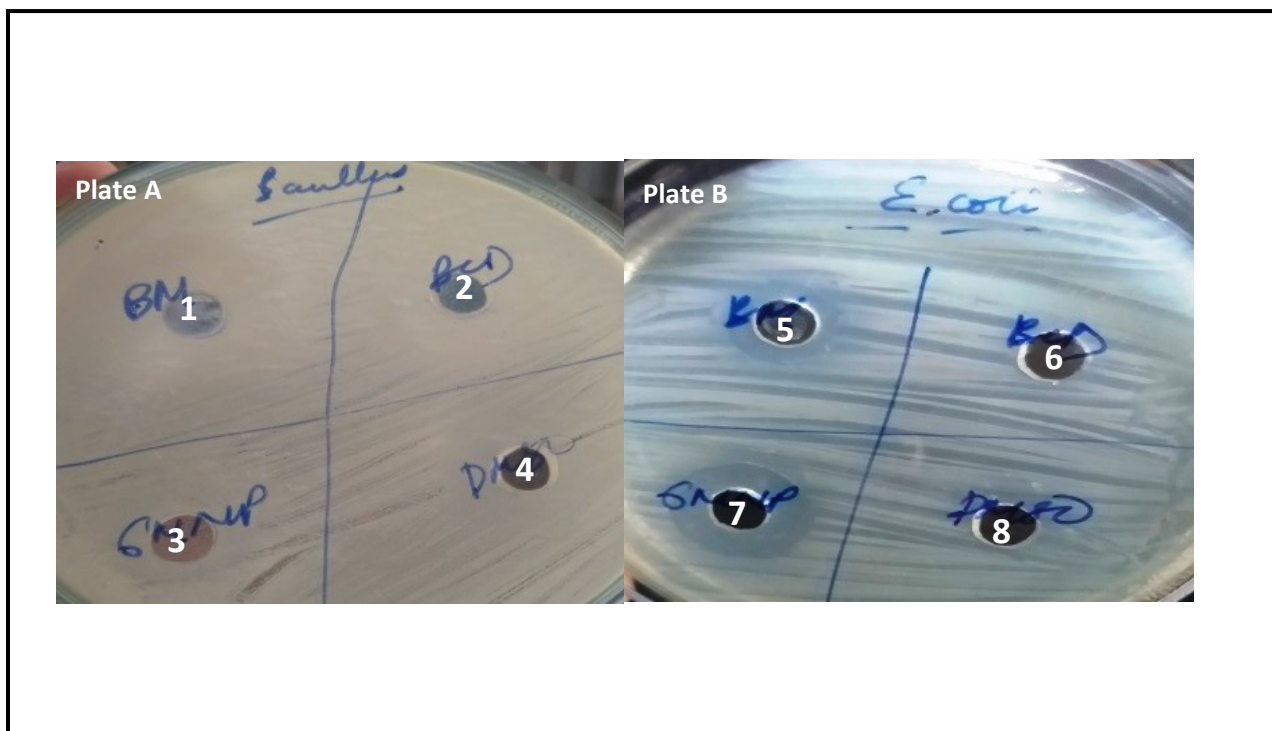

**Figure S7:** Well diffusion assay of 6-MP and  $\beta$ -CD, singly and in combination together as IC.

(Plate A shows susceptibility of *B. subtilis* towards 6-MP and  $\beta$ -CD, singly and in combination together as IC where Well 1 contains 75 mM of 6-MP, Well 2 contains 75 mM of  $\beta$ -CD, Well 3 contains 75 mM of IC and Well 4 contains DMSO.)

(Plate B shows susceptibility of *E. coli* towards 6-M and  $\beta$ -CD, singly and in combination together as IC where Well 5 contains 75 mM of 6-MP, Well 6 contains 75 mM of  $\beta$ -CD, Well 7 contains 75 mM of IC and Well 8 contains DMSO.)
